# Supplementary material
Source: PubMed Central journal article supplement (PMC3911016)
Supplement: AEM.02362-13_zam999105005so1.pdf [file AEM.02362-13_zam999105005so1.pdf]

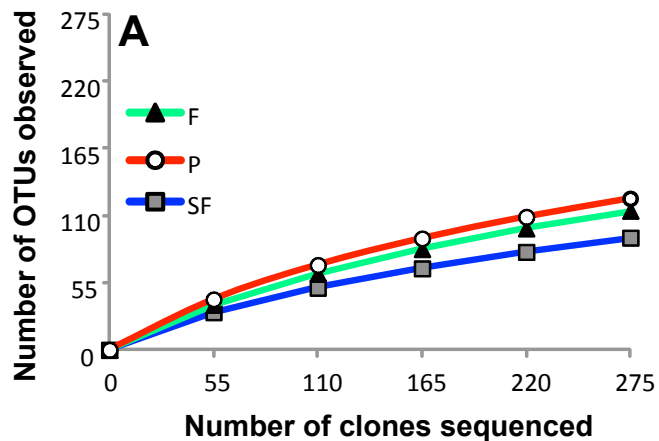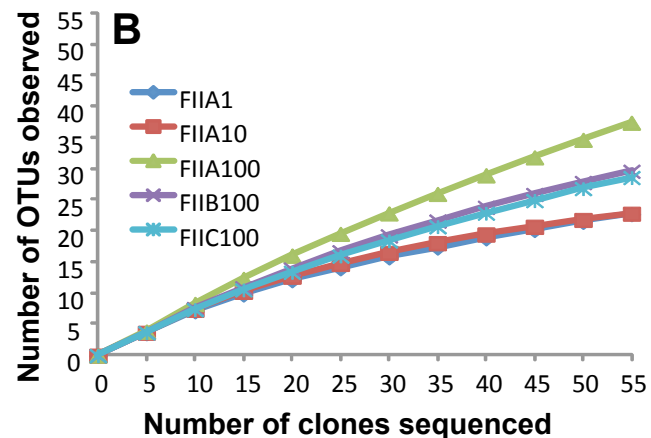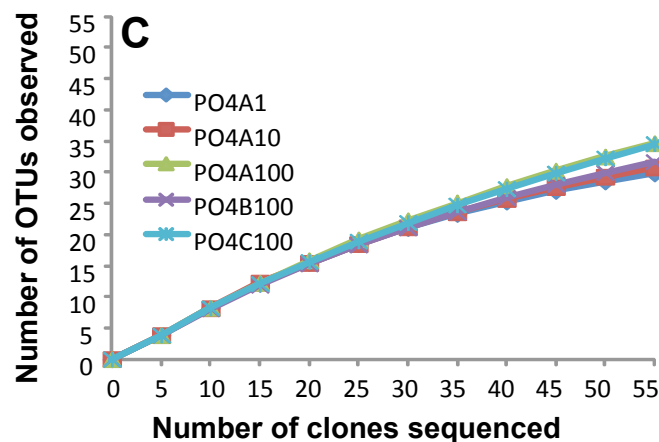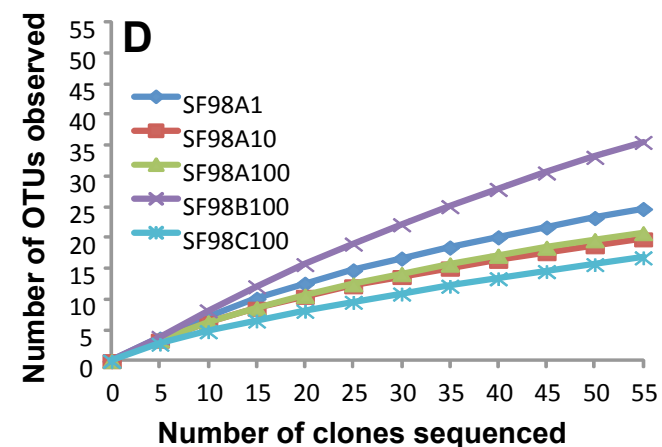

**Supplementary figure SF1.** Operational taxonomic unit (OTU) accumulation curves for three land uses in the Amazon. Panels: (A) a total of 275 *nifH* gene clone sequences were combined per treatment. A total of 55 *nifH* gene clones sequenced per replicate sample for (B) forest, (C) pasture, and (D) secondary forest. The observed number of OTUs were calculated at 3% dissimilarity.

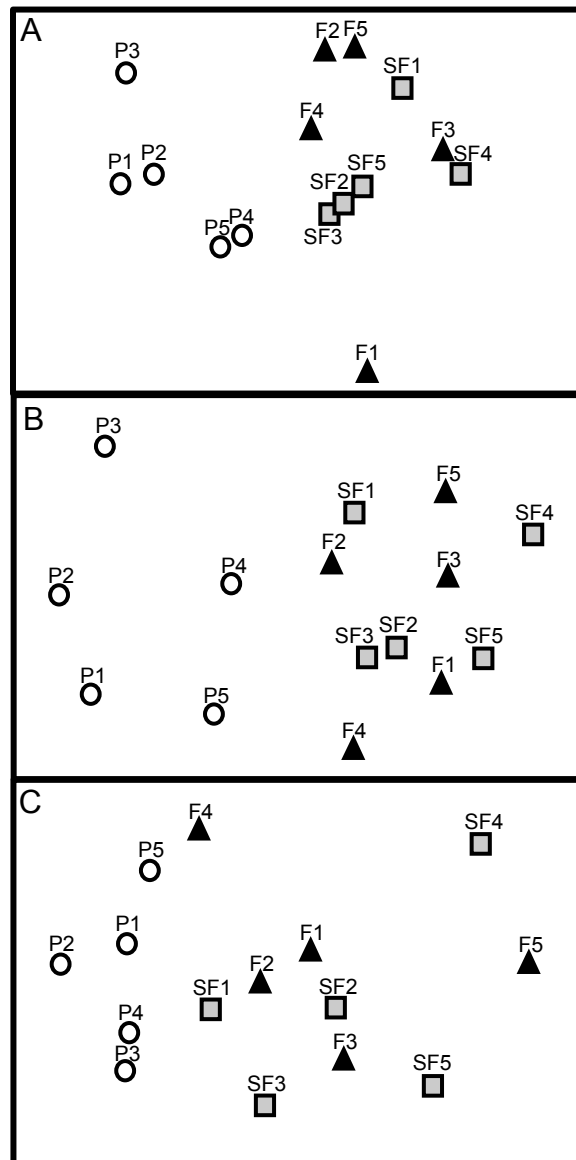

**Supplementary Figure SF2.** Non-metric multidimensional scaling representation of the *nifH* gene sequence composition based on Bray-Curtis indices at (A) 95% (B) 90% (C) 80% DNA identity for three different land use systems in the Amazon: Black triangles = forest samples (F), white circle = pasture samples (P), and grey squares = secondary forest samples (SF). The 2D stress for panels A, B, and C were 0.11, 0.12, 0.14, respectively.

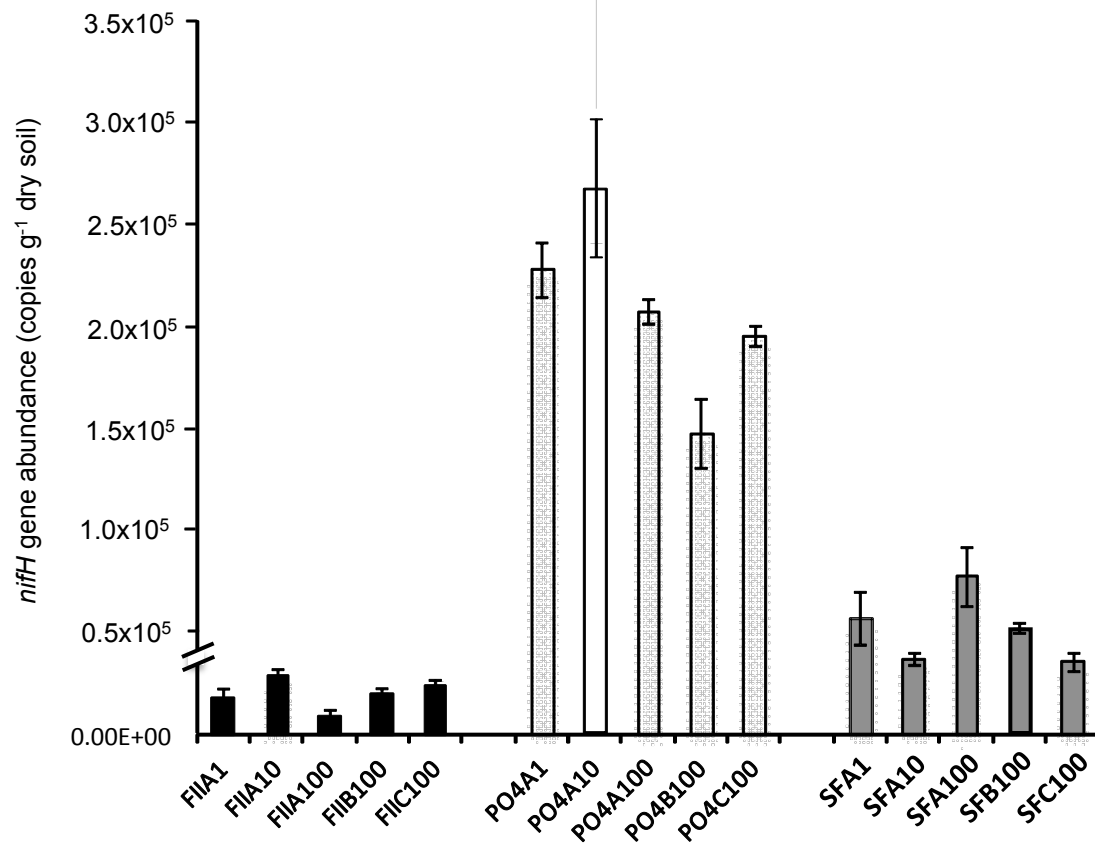

**Supplementary figure SF3.** Copy numbers of the *nifH* gene per gram of soil determined for three different land use systems in the Amazon. Each bar represents the average of the three technical replicates. F= forest, P= pasture and SF= secondary forest.

**Supplementary table ST1.** Sampling site coordinates and soil physiochemical characteristics for three land use systems in the Amazon.

| Sample   | Latitude        | Longitude       | Soil moisture (%) | N      | C      | C/N   | pH   | P  | S  | K   | Ca | Mg | Al | H <sup>+</sup> | CEC  | V (%) | Al <sup>+</sup> sat (m) |
|----------|-----------------|-----------------|-------------------|--------|--------|-------|------|----|----|-----|----|----|----|----------------|------|-------|-------------------------|
| FIIA1    | 10° 10' 18.74"S | 62° 47' 15.60"W | 13.80             | 0.1379 | 1.728  | 12.53 | 5.69 | 12 | 4  | 1.6 | 48 | 8  | -1 | 22             | 79.6 | 72    | -1                      |
| FIIA10   | 10° 10' 18.37"S | 62° 47' 15.79"W | 17.43             | 0.2082 | 2.457  | 11.80 | 5.82 | 18 | 7  | 2.2 | 59 | 7  | 1  | 31             | 99.2 | 69    | 1                       |
| FIIA100  | 10° 10' 15.76"S | 62° 47' 17.04"W | 13.33             | 0.173  | 2.093  | 12.16 | 5.42 | 14 | 4  | 4.1 | 31 | 11 | -1 | 25             | 71.1 | 65    | -1                      |
| FIIIB100 | 10° 10' 15.14"S | 62° 47' 13.75"W | 16.11             | 0.078  | 0.9281 | 11.84 | 5.15 | 6  | 3  | 2.0 | 10 | 5  | 1  | 31             | 48.0 | 35    | 6                       |
| FIIIC100 | 10° 10' 18.17"S | 62° 47' 12.76"W | 13.32             | 0.1192 | 1.2025 | 10.08 | 5.48 | 6  | 3  | 1.4 | 26 | 4  | 1  | 25             | 56.4 | 56    | 3                       |
| P04A1    | 10° 09' 44.42"S | 62° 47' 58.34"W | 14.34             | 0.082  | 0.99   | 12.01 | 5.27 | 3  | 8  | 3.2 | 5  | 4  | 1  | 25             | 37.2 | 33    | 8                       |
| P04A10   | 10° 09' 44.06"S | 62° 47' 58.42"W | 9.68              | 0.057  | 0.67   | 11.79 | 5.32 | 2  | 4  | 2.8 | 5  | 3  | 1  | 22             | 32.8 | 33    | 8                       |
| P04A100  | 10° 09' 41.18"S | 62° 47' 58.24"W | 19.09             | 0.188  | 2.79   | 14.86 | 5.78 | 6  | 4  | 1.2 | 40 | 11 | -1 | 25             | 77.2 | 68    | -1                      |
| P04B100  | 10° 09' 40.86"S | 62° 47' 55.39"W | 17.76             | 0.121  | 1.90   | 15.71 | 5.48 | 4  | 3  | 0.9 | 15 | 5  | 1  | 31             | 51.9 | 40    | 5                       |
| P04C100  | 10° 09' 44.17"S | 62° 47' 55.07"W | 9.56              | 0.099  | 1.16   | 11.74 | 5.23 | 3  | 23 | 1.6 | 23 | 4  | 1  | 28             | 56.6 | 51    | 3                       |
| SCA1     | 10° 09' 38.16"S | 62° 47' 52.62"W | 18.10             | 0.15   | 1.71   | 11.68 | 4.96 | 5  | 6  | 1.4 | 19 | 9  | 1  | 38             | 67.4 | 44    | 3                       |
| SCA10    | 10° 09' 36.58"S | 62° 47' 51.36"W | 20.76             | 0.15   | 1.77   | 11.67 | 5.16 | 6  | 5  | 1.5 | 24 | 10 | 1  | 42             | 77.5 | 46    | 3                       |
| SCA100   | 10° 09' 34.92"S | 62° 47' 53.38"W | 14.40             | 0.15   | 1.74   | 11.67 | 4.88 | 6  | 6  | 1.3 | 9  | 6  | 2  | 38             | 54.3 | 30    | 11                      |
| SCB100   | 10° 09' 34.70"S | 62° 47' 50.14"W | 10.37             | 0.09   | 1.00   | 11.18 | 4.59 | 6  | 5  | 0.6 | 10 | 5  | 3  | 38             | 53.6 | 29    | 16                      |
| SCC100   | 10° 09' 37.94"S | 62° 47' 49.45"W | 15.47             | 0.14   | 1.86   | 13.37 | 4.8  | 6  | 3  | 1.1 | 13 | 6  | 3  | 58             | 78.1 | 26    | 13                      |

Measured soil variables: C, carbon; N, nitrogen; pH, potential activity of hydrogen; P, phosphorus; S, sulfur; K, potassium; Ca, calcium; Mg, magnesium; Al, aluminum; H<sup>+</sup>, hydrogen; CEC, potential cation exchange capacity; V, base saturation; Al<sup>+</sup> sat, aluminum saturation.

C and N are expressed in g.Kg<sup>-1</sup> soil; P and S are expressed as mg dm<sup>-3</sup>; K, Ca, Mg, Al and CEC are expressed in mmol c.dm<sup>-3</sup>.

**Supplementary table ST2.** Operational protein units (OPUs) and the closest matched sequences obtained through NCBI BlastP search of few randomly selected *nifH* amino acid sequences from each OPU. The right most column represents the taxonomic grouping assigned based on the Blast search.

| OPU No. | Closest relative (Accession number)                                                                                                                                                                                                                                                                                                                                                                                         | % Similarity | Taxonomic description              |
|---------|-----------------------------------------------------------------------------------------------------------------------------------------------------------------------------------------------------------------------------------------------------------------------------------------------------------------------------------------------------------------------------------------------------------------------------|--------------|------------------------------------|
| OPU1    | <i>Geobacter daltonii</i> (YP_002538026), <i>Anaeromyxobacter</i> sp.( YP_001380211), <i>Pelobacter propionicus</i> (YP_903117), uncultured bacterium (AY601069), uncultured bacterium (AY601072), <i>Geobacter uraniireducens</i> (NC_009483)                                                                                                                                                                              | 94-99        | Delta-proteobacteria               |
| OPU2    | uncultured bacterium (ABF66505), uncultured bacterium (ACI32206), uncultured bacterium (ADD48906)                                                                                                                                                                                                                                                                                                                           | 89-99        | Uncultured                         |
| OPU4    | <i>Nostoc azollae</i> (YP_003720733), <i>Anabaena</i> sp. (NC_003272)                                                                                                                                                                                                                                                                                                                                                       | 97-98        | Cyanobacteria                      |
| OPU5    | <i>Azospirillum</i> (DQ787332), <i>Burkholderia</i> sp. JPY422 (FN544022), <i>Methylocapsa aurea</i> (FN433472), <i>Methylobacterium nodulans</i> (AY312969), <i>Azorhizobium doebereineriae</i> (FJ223129), <i>Bradyrhizobium japonicum</i> (EF394157), <i>Bradyrhizobium</i> sp. SEMIA (HQ259566), <i>Burkholderia tuberum</i> (FN908431), <i>Bradyrhizobium yuanmingense</i> (EF394167), uncultured bacterium (EU912866) | 93-100       | Alpha/Beta-Proteobacteria          |
| OPU7    | <i>Methanocella arvoryzae</i> (YP_686176), <i>Methanocella conradii</i> (YP_005379432)                                                                                                                                                                                                                                                                                                                                      | 89-93        | Archaea                            |
| OPU9    | <i>Methanosphaerula palustris</i> (YP_002465657), <i>Methanoregula boonei</i> (YP_001404303)                                                                                                                                                                                                                                                                                                                                | 93           | Archaea                            |
| OPU10   | <i>Diplosphaera colitermitum</i> TAV2 (ZP_03723745), <i>Opitutaceae</i> bacterium TAV5(ZP_09596372)                                                                                                                                                                                                                                                                                                                         | 93-94        | Verrucomicrobia                    |
| OPU11   | uncultured bacterium (EU912903), uncultured bacterium (ACO36751 )                                                                                                                                                                                                                                                                                                                                                           | 85-89        | Uncultured                         |
| OPU16   | uncultured bacterium (EU913014), Uncultured bacterium (EU090292), Uncultured Bacterium (FJ807383)                                                                                                                                                                                                                                                                                                                           | 94-95        | Uncultured                         |
| OPU19   | uncultured bacterium (EU913008) <i>Spirochaeta zuelzeriae</i> (AF325795), Uncultured bacterium (AFK30407)                                                                                                                                                                                                                                                                                                                   | 97-90        | Uncultured/<br><i>Spirochaetes</i> |
| OPU51   | <i>Syntrophobotulus glycolicus</i> (YP_004267124), uncultured bacterium (AEO13465), <i>Heliobacterium gestii</i> (BAD80876)                                                                                                                                                                                                                                                                                                 | 90-94        | Firmicutes/ <i>Clostridia</i>      |
| OPU56   | <i>Paenibacillus sabiniae</i> (HM583799) <i>Paenibacillus sabiniae</i> (HM583798)                                                                                                                                                                                                                                                                                                                                           | 92-95        | Firmicutes                         |
| OPU63   | uncultured bacterium (AB273365), <i>Syntrophothermus lipocalidus</i> (YP_003703438), Uncultured bacterium (AB273365)                                                                                                                                                                                                                                                                                                        | 87-90        | Firmicutes/ <i>Clostridia</i>      |
| OPU72   | <i>Clostridium kluyveri</i> (YP_001394435), uncultured low G+C Gram-positive bacterium (AAN78187)                                                                                                                                                                                                                                                                                                                           | 97           | <i>Clostridia</i>                  |
